# Supplementary material for: Lcp1 Is a Phosphotransferase Responsible for Ligating Arabinogalactan to Peptidoglycan in Mycobacterium tuberculosis
Source: PubMed Central journal article supplement (PMC4981717; doi:10.1128/mbio.00972-16), 2016-08-02
Supplement: mbo004162922s1.pdf [file mbo004162922s1.pdf]

1 **Supplementary Information**

2

3 **Lcp1 is a phosphotransferase responsible for ligating arabinogalactan to**  
4 **peptidoglycan in *Mycobacterium tuberculosis***

5

6 James Harrison, Georgina Lloyd, Maju Joe, Todd L. Lowary, Edward Reynolds, Hannah  
7 Walters-Morgan, Andrew Lovering, Gurdyal S. Besra, Luke J. Alderwick

8

9

## 1 **Chemical Synthesis**

2 It was decided to substitute the pyrophosphate linked polyprenyl of the endogenous  
3 acceptor with an *O*-alkyl group, because pyrophosphate-linked polyprenols are difficult to  
4 use as acceptors as they are unstable. An octyl glycoside was chosen as a replacement  
5 because these have previously been used successfully as synthetic ligands and acceptors  
6 (1). Disaccharides containing L-Rha- $\alpha$ (1 $\rightarrow$ 3)-D-GlcNAc have been synthesised previously  
7 (2, 3) using a thioglycoside donor, which activated *in situ* from *N*-iodosuccinimide (NIS)  
8 and triflic (TfOH) acid (4). The scheme used this coupling method and is shown in Scheme  
9 S2. To synthesize **1**, thioglycoside **6** (5) and alcohol **5** (6) were coupled using *N*-  
10 iodosuccinimide (NIS) and trifluoromethanesulphonic (triflic) acid leading to octyl 2,3,4-  
11 tri-*O*-acetyl- $\alpha$ -L-rhamnopyranosyl-(1 $\rightarrow$ 3)-2-acetamido-4,6-*O*-benzylidene-2-deoxy- $\alpha$ -D-  
12 glucopyranoside (**7**) (Scheme S2) in 51% yield. The heteronuclear one-bond coupling  
13 constant ( $^1J_{C,H}$ ) for the anomeric C atom (172 Hz) unambiguously established that the  
14 compound had the required  $\alpha$ -*rhamno* configuration (7). Deprotection of **7** using  
15 hydrogenolysis of the benzylidene acetyl followed by cleavage of the acetate esters with  
16 methanolic ammonia afforded the final product,  $\alpha$ -L-rhamnopyranosyl-(1 $\rightarrow$ 3)-2-  
17 acetamido-2-deoxy- $\alpha$ -D-glucopyranoside (**1**) in 80% yield over the two steps.

18 The preparation of **2** and **3** followed a common synthetic route as illustrated in  
19 Scheme S3 starting from the previously reported disaccharide **8** and two thioglycosides **9**  
20 and **10**, which were prepared following established protocols (8). Glycosylation of  
21 disaccharide **8** with thioglycoside **9** using NIS and silver triflate provided trisaccharide **11**,  
22 which was then treated with hydrazine acetate affording alcohol **12** in 87% overall  
23 yield from **8**. Subsequent glycosylation of **12** with thioglycoside **10**, again promoted by NIS  
24 and silver triflate, gave an 89% yield of tetrasaccharide **13**. A portion of this intermediate

1 was deprotected by hydrolysis of the acetal protecting groups and then hydrolysis of the  
2 esters under Zemplen conditions to afford **2** in 93% yield. Alternatively, another portion of  
3 **13** was treated with hydrazine acetate affording tetrasaccharide alcohol **14** in 97% yield.  
4 Glycosylation with **9** afforded **15** (81% yield), which was then deprotected under the same  
5 conditions used for **2**, leading to the formation of **3** in 91% overall yield. In all glycosylation  
6 reactions, the stereochemistry of the newly introduced galactofuranosyl residue could be  
7 determined by <sup>1</sup>H NMR and <sup>13</sup>C NMR spectroscopy. In particular, the <sup>3</sup>J<sub>H1,H2</sub> of the  
8 galactofuranosyl residue was <2 Hz and the C-1 chemical shift was between 105 and 110  
9 ppm (9).

10

11

12

13

14

15

16

17

18

19

20

21

22

23

24

1 **Supplementary Figure Legends**

2

3 **Figure S1. Sequence alignment of Lcp1 orthologues from *M. tuberculosis*, *M.***  
4 ***smegmatis*, *C. glutamicum* and LCP homologues from *B. subtilis* and *S. pneumoniae*.**

5 Amino acid sequences were aligned using ClustalW and rendered with EsPRIPT. Secondary  
6 structure information was obtained from PDB coordinates 2xxp.

7

8 **Figure S2.** Reaction scheme for the synthesis of octyl  $\alpha$ -L-rhamnopyranosyl-(1 $\rightarrow$ 3)-2-  
9 acetamido-2-deoxy- $\alpha$ -D-glucopyranoside (**1**).

10

11 **Figure S3.** Reaction scheme for the synthesis of octyl  $\beta$ -D-galactofuranosyl-(1 $\rightarrow$ 5)- $\beta$ -D-  
12 galactofuranosyl-(1 $\rightarrow$ 4)- $\alpha$ -L-rhamnopyranosyl-(1 $\rightarrow$ 3)-2-acetamido-2-deoxy- $\alpha$ -D-  
13 glucopyranoside (**2**) and octyl  $\beta$ -D-galactofuranosyl-(1 $\rightarrow$ 6)- $\beta$ -D-galactofuranosyl-(1 $\rightarrow$ 5)- $\beta$ -  
14 D-galactofuranosyl-(1 $\rightarrow$ 4)- $\alpha$ -L-rhamnopyranosyl-(1 $\rightarrow$ 3)-2-acetamido-2-deoxy- $\alpha$ -D-  
15 glucopyranoside (**3**).

16

17 **Figure S4. Flow chart tracking radioactivity incorporated from UDP-[ $^{14}$ C]Galp**  
18 **through each of the analytical steps leading to TLC analysis (Figure 5).**

19

20

21

22

23

24

25

26

27

28

## 1 **Supplementary Methods**

### 2 **Synthesis of 1–3.**

3 **General Methods.** Reactions were carried out in oven-dried glassware. All reagents used  
4 were purchased from commercial sources and were used without further purification  
5 unless noted. Reaction solvents were purified by successive passage through columns of  
6 alumina and copper under nitrogen. Unless stated otherwise, all reactions were carried out  
7 at room temperature under a positive pressure of argon and were monitored by TLC on  
8 Silica Gel 60 F<sub>254</sub> (0.25 mm, E. Merck). Spots were detected under UV light or by charring  
9 with acidified *p*-anisaldehyde solution in EtOH. Unless otherwise indicated, all column  
10 chromatography was performed on Silica Gel (40–60 μM). The ratio between silica gel and  
11 crude product ranged from 100 to 50:1 (w/w). Optical rotations were measured at 22 ± 2  
12 °C and are in units of deg•mL(dm•g)<sup>-1</sup>. <sup>1</sup>H NMR spectra were recorded at 300 or 500 MHz,  
13 and chemical shifts were referenced to TMS (0.0, CDCl<sub>3</sub>) or CD<sub>3</sub>OD (3.30, CD<sub>3</sub>OD). <sup>13</sup>C NMR  
14 spectra were recorded at 75 or 125 MHz, and <sup>13</sup>C chemical shifts were referenced to  
15 internal CDCl<sub>3</sub> (77.06 ppm, CDCl<sub>3</sub>), or CD<sub>3</sub>OD (48.9, CD<sub>3</sub>OD). Organic solutions were  
16 concentrated under vacuum at < 40 °C. Electrospray mass spectra were recorded on  
17 samples suspended in mixtures of THF with MeOH and added NaCl. MALDI mass  
18 spectrometry was performed on a Voyager Elite time-of-flight spectrometer on samples  
19 suspended in 2,5-dihydroxy-benzoic acid or *trans*-3-indoleacrylic acid using the delayed-  
20 extraction mode and positive-ion detection.

21  
22 **Octyl α-L-rhamnopyranosyl-(1→3)-2-acetamido-2-deoxy-α-D-glucopyranoside (1) .**

23 Disaccharide **7** (110 mg, 0.159 mmol) was dissolved in acetic acid–H<sub>2</sub>O (5 mL, 80:20) and  
24 subjected to hydrogenolysis using palladium on carbon (10%, 15 mg). The reaction mixture

1 was stirred overnight and filtered through Celite and evaporated. The residue was co-  
2 evaporated thrice with toluene and dissolved in ammonia–MeOH (15 mL, 2.0M) and stirred  
3 for 20 h. The solution was evaporated to dryness. Flash column chromatography (0–15%  
4 MeOH in CHCl<sub>3</sub>) of the residue gave **1** as a white powder (76 mg, 80%). M.P. 120–121 °C,  
5  $[\alpha]_D -13.4$  (*c* 1, CHCl<sub>3</sub>).  $\delta_H$  (300 MHz; CD<sub>3</sub>OD) 4.91 (s, 1 H), 4.74 (d, 1 H, *J* = 2.8 Hz, H-1),  
6 3.51–4.15 (10 H), 2.05 (s, 3 H, NHCOCH<sub>3</sub>), 1.51–1.60 (2 H, m), 1.25–1.46 (m, 13 H), 0.86 (m,  
7 3 H);  $\delta_C$  (75 MHz; CD<sub>3</sub>OD) 173.4, 101.2, 97.5, 79.7, 72.3, 72.0, 71.0, 70.4, 69.0, 68.1, 68.1,  
8 60.5, 53.4, 31.9, 29.4, 29.2, 29.1, 26.0, 22.7, 22.3, 16.8, 13.9 (C-a). *m/z* (EI) 480.2831 (M<sup>+</sup> +  
9 H. C<sub>22</sub>H<sub>42</sub>NO<sub>10</sub> requires 480.2809).

10

11 **Octyl β-D-galactofuranosyl-(1→5)-β-D-galactofuranosyl-(1→4)-α-L-**

12 **rhamnopyranosyl-(1→3)-2-acetamido-2-deoxy-α-D-glucopyranoside (2).**

13 Tetrasaccharide **13** (0.2 g, 0.12 mmol) was dissolved in 4:1 acetic acid–H<sub>2</sub>O (8 mL) and  
14 heated at 75–77 °C for 5 h. The solvent was then evaporated under vacuum and the residue  
15 was dissolved in CH<sub>2</sub>Cl<sub>2</sub>–MeOH (7:3, 5 mL) followed by the dropwise addition of NaOMe<sub>3</sub> in  
16 MeOH (0.1M, enough to maintain *pH* of the solution around 8). More MeOH was added  
17 periodically as the reaction progressed to keep the solution homogenous. The reaction  
18 mixture was then stirred at room temperature for 16 h and was neutralized by the addition  
19 of Amberlyst-15 (H<sup>+</sup>) cation exchange resin. The solution was filtered and the filtrate was  
20 concentrated to give a syrupy residue. This crude product was then dissolved in H<sub>2</sub>O (0.5  
21 mL) and was purified by C-18 column chromatography, (H<sub>2</sub>O–MeOH, 0–75% MeOH). The  
22 fractions containing the product were combined, concentrated under vacuum, re-dissolved  
23 in deionized H<sub>2</sub>O and lyophilized to obtain **2** (0.09 g, 93%) as an amorphous solid. The data  
24 for this compound matched with the data previously reported (8).

1  
2 **Octyl  $\beta$ -D-galactofuranosyl-(1 $\rightarrow$ 6)- $\beta$ -D-galactofuranosyl-(1 $\rightarrow$ 5)- $\beta$ -D-**  
3 **galactofuranosyl-(1 $\rightarrow$ 4)- $\alpha$ -L-rhamnopyranosyl-(1 $\rightarrow$ 3)-2-acetamido-2-deoxy- $\alpha$ -D-**  
4 **glucopyranoside (3).**  
5 Pentasaccharide **15** (0.2 g, 0.093 mmol) was dissolved in 4:1 acetic acid–H<sub>2</sub>O (8 mL) and  
6 heated at 75–77 °C for 5 h. The solvent was then evaporated and the residue was dissolved  
7 in CH<sub>2</sub>Cl<sub>2</sub>–MeOH (7:3, 6 mL) followed by the dropwise addition of NaOMe in MeOH (0.1M,  
8 enough to maintain pH of the solution around 8). More MeOH was added periodically as the  
9 reaction progressed to keep the solution homogenous. The reaction mixture was then  
10 stirred at room temperature for 16 h and was neutralized by the addition of Amberlyst-15  
11 (H<sup>+</sup>) cation exchange resin. The solution was filtered and the filtrate was concentrated to  
12 give a syrupy residue. This crude product was then dissolved in H<sub>2</sub>O (0.5 mL) and was  
13 purified by C-18 column chromatography, (H<sub>2</sub>O–MeOH, 0–75% MeOH). The fractions  
14 containing the product were combined, concentrated under vacuum, re-dissolved in  
15 deionized H<sub>2</sub>O and lyophilized to obtain **3** (0.083 g, 91%) as an amorphous solid. The data  
16 for this compound matched with the data previously reported (8).

17  
18 **Octyl 2,3,4-tri-*O*-acetyl- $\alpha$ -L-rhamnopyranosyl-(1 $\rightarrow$ 3)-2-acetamido-4,6-*O*-**  
19 **benzylidene-2-deoxy- $\alpha$ -D-glucopyranoside (7) .**

20 Methyl 2,3,4-tri-*O*-acetyl-1-thio  $\alpha$ -L-rhamnopyranoside (**6**) (5) (500 mg, 1.56 mmol) and  
21 octyl 2-acetamido-2-deoxy-4,6-*O*-benzylidene- $\alpha$ -D-glucopyranoside (**5**) (6) (571 mg, 1.35  
22 mmol) were dissolved in CH<sub>2</sub>Cl<sub>2</sub> (80 mL); powdered 4Å molecular sieves (2.28 g) were  
23 added and the reaction mixture stirred for 1 h. *N*-iodosuccinimide (381 mg, 1.69 mmol)

1 was then added. A satd solution of trifluoromethanesulfonic (trflic) acid in CH<sub>2</sub>Cl<sub>2</sub> (1.05  
2 mL, 0.15 mol equivalent) was added dropwise and the reaction mixture stirred in the dark.  
3 After 2 h, another 0.15 mol equivalent of the triflic acid in CH<sub>2</sub>Cl<sub>2</sub> solution was added  
4 dropwise. A colour change of the reaction from pink to purple to brown was evident. After  
5 7 h, the reaction was quenched by the addition of triethylamine (215 μL), filtered and  
6 diluted with CH<sub>2</sub>Cl<sub>2</sub> and the solution was washed with sodium thiosulfate in NaOH (5 w/v,  
7 0.5M), followed by aqueous sulphuric acid (1.0M), satd aqueous NaHCO<sub>3</sub>, and brine before  
8 being dried over anhydrous MgSO<sub>4</sub> and evaporated to an oil. Flash column chromatography  
9 (0–50% EtOAc–toluene) afforded an off white solid that was recrystallised from ethanol–  
10 H<sub>2</sub>O (50:50) to yield **7** as a white powder (480 mg, 51%). M.P. 151–152°C, [α]<sub>D</sub> +4.2 (*c* 1,  
11 CHCl<sub>3</sub>). δ<sub>H</sub> (300 MHz) 7.30–7.45 (m, 5 H), 5.83 (d, 1 H, *J* = 8.8 Hz), 5.43 (s, 1 H), 4.95 (dd, 1 H,  
12 *J* = 4.0, 9.7 Hz), 4.90 (d, 1 H, *J* = 2.5 Hz), 4.88 (app t, 1 H, *J* = 9.7 Hz), 4.79 (d, 1 H, *J* = 3.5 Hz),  
13 4.50 (br app t, 1 H, *J* = 2.5, 4.0 Hz), 4.20 (dd, 1 H, *J* = 4.2, 10.0 Hz), 4.07–4.15 (m, 1 H), 3.98  
14 (br app t, 1 H, *J* = 9.1, 10.0 Hz), 3.73 (app dt, 1 H, *J* = 3.5, 9.6, 8.8 Hz), 3.66 (app t, 1 H, *J* = 9.6  
15 Hz), 3.63 (dt, 1 H, *J* = 6.8, 9.9 Hz, octyl OCH<sub>2</sub>), 3.53 (br app t, 1 H, *J* = 9.5, 8.5 Hz), 3.35 (dt, 1  
16 H, *J* = 9.9, 6.7 Hz), 3.20 (dq, 1 H, *J* = 2.0, 8.7 Hz), 1.86, 1.94, 1.96, 1.98 (4 x 3H, 4 x s, 3 x  
17 COCH<sub>3</sub>, 1 x NHCOCH<sub>3</sub>), 1.51–1.60 (m, 2H octyl CH<sub>2</sub>), 1.24–1.45 (m, 10 H, octyl CH<sub>2</sub>), 1.09 (t,  
18 3 H, octyl CH<sub>3</sub>), 0.85 (d, 3 H, *J* = 2.0 Hz, H-6'), δ<sub>C</sub> (75 MHz) 170.5, 170.3, 170.2, 170.0, 137.0–  
19 126.5, 102.2, 98.4 (<sup>1</sup>*J*<sub>C-H</sub> 172 Hz), 98.0, 80.4, 76.2, 71.6, 71.0, 69.2, 68.6, 68.5, 66.5, 63.3,  
20 53.2, 32.0, 29.6, 29.5, 29.5, 26.4, 23.6, 22.8, 21.1, 20.9, 16.8, 14.3; Anal. Calcd. For  
21 C<sub>35</sub>H<sub>51</sub>NO<sub>13</sub>: C: 60.6, H 7.4, N 2.1; found C 60.2, H 7.6, N 2.0. *m/z* (EI) 593.3193 (M<sup>+</sup>–  
22 (OCOCH<sub>3</sub>)<sub>2</sub>+2H. C<sub>31</sub>H<sub>47</sub>NO<sub>10</sub> requires 593.3200).

23



1 **Octyl 2,3,6-tri-*O*-benzoyl- $\beta$ -D-galactofuranosyl-(1 $\rightarrow$ 4)-2,3-isopropylidene- $\alpha$ -L-**  
2 **rhamnopyranosyl-(1 $\rightarrow$ 3)-2-acetamido-4,6-*O*-benzylidene-2-deoxy- $\alpha$ -D-**  
3 **glucopyranoside (**12**).**

4 To a solution of alcohol **8** (1.62 g, 2.67 mmol) and thioglycoside **9** (2.23 g, 3.2 mmol) in  
5 CH<sub>2</sub>Cl<sub>2</sub> (80 mL) was added 4 Å molecular sieves (0.5 g) and the mixture was stirred for 30  
6 min before cooling to 0 °C. NIS (0.86 g, 3.8 mmol) and silver trifluoromethane sulfonate  
7 (0.16 g, 0.6 mmol) were added and the mixture was continued to stir at 0 °C until the  
8 reaction was complete as determined by TLC. The reaction was then quenched by adding  
9 triethylamine until the pH of the solution was slightly basic (pH < 8). The reaction mixture  
10 was then quickly filtered into a solution of satd aq sodium thiosulfate (100 mL) and  
11 extracted with CH<sub>2</sub>Cl<sub>2</sub>. The organic layer was then washed with H<sub>2</sub>O (2 × 70 mL), separated  
12 and dried over anhydrous Na<sub>2</sub>SO<sub>4</sub>. The organic layer was concentrated to give a syrupy  
13 residue that was filtered through a short silica column using 1:1 hexane–EtOAc as the  
14 eluent. The fractions containing **11** were combined and evaporated to give an oil that was  
15 dried under vacuum for 2 h before being carried forward. Crude **11** was then dissolved in  
16 CH<sub>2</sub>Cl<sub>2</sub>–MeOH (9:1, 60 mL) and then hydrazine acetate (0.36 g, 3.8 mmol), was added. The  
17 reaction was stirred for 1 h and then poured into H<sub>2</sub>O and extracted with CH<sub>2</sub>Cl<sub>2</sub>. The  
18 organic layer was separated, dried with anhydrous Na<sub>2</sub>SO<sub>4</sub> and concentrated to a syrupy  
19 residue that was purified by column chromatography to give **12** (2.5 g, 87% over two  
20 steps) as an amorphous solid. *R*<sub>f</sub> 0.29 (55:45 hexane–EtOAc); [α]<sub>D</sub> +4.7 (*c* 0.5, CHCl<sub>3</sub>); <sup>1</sup>H  
21 NMR (500 MHz, CDCl<sub>3</sub>, δ<sub>H</sub>) 8.1–7.95 (m, 6 H), 7.62–7.50 (m, 3 H), 7.48–7.35 (m, 8 H), 7.20–  
22 7.03 (m, 3 H), 5.74 (s, 1H), 5.68 (d, 1 H, *J* = 10.0 Hz), 5.60 (d, 1 H, *J* = 4.9 Hz), 5.57 (s, 1 H),  
23 5.53 (s, 1 H), 5.09 (s, 1H), 4.71 (d, 1 H, *J* = 3.7 Hz), 4.56 (dd, 1 H, *J* = 6.5, 10.8 Hz), 4.45–4.37  
24 (m, 2 H), 4.37–4.23 (m, 3 H), 4.10 (d, 1H, *J* = 6.0 Hz), 3.98 (dd, 1 H, *J* = 9.6, 9.6 Hz), 3.95–3.80

1 (m, 2 H), 3.75 (dd, 1 H,  $J = 10.2$  Hz), 3.74–3.3.67 (m, 1 H), 3.60 (dd, 1 H,  $J = 9.3$  Hz), 3.52 (dd,  
2 1 H,  $J = 7.6, 10.0$  Hz), 3.40 (ddd, 1 H,  $J = 6.6, 9.7, 13.3$  Hz), 2.66 (d, 1 H,  $J = 8.9$  Hz), 2.03 (s, 3  
3 H), 1.64–1.58 (m, 3 H), 1.52 (s, 3 H), 1.40–1.20 (m, 13 H), 0.9 (t, 3 H,  $J = 7.0$  Hz), 0.83 (d, 3 H,  
4  $J = 6.0$  Hz);  $^{13}\text{C}$  NMR (125 MHz,  $\text{CDCl}_3$ ,  $\delta_{\text{C}}$ ) 169.8, 166.4, 166.1, 165.2, 137.1, 133.6, 133.5,  
5 133.1, 129.9, 129.8, 129.7, 129.6, 129.1, 129.1, 128.9, 128.5, 128.4, 128.3, 128.0, 126.1,  
6 109.4, 104.3, 101.7, 98.2, 98.1, 83.4, 81.6, 80.0, 78.6, 77.8, 76.7, 76.2, 75.0, 69.0, 68.9, 68.3,  
7 65.9, 64.4, 63.2, 53.6, 31.8, 29.4, 29.3, 29.2, 27.9, 26.3, 26.2, 23.4, 22.6, 17.1, 14.1. HRMS  
8 (ESI) calcd. for  $(\text{M}+\text{Na})^+$   $\text{C}_{59}\text{H}_{71}\text{NO}_{18}\text{Na}$  1104.4563, found 1104.4565.

9  
10 **Octyl 2,3,5-tri-*O*-benzoyl-6-*O*-levulinoyl- $\beta$ -D-galactofuranosyl-(1 $\rightarrow$ 5)-2,3,6-tri-*O*-**  
11 **benzoyl- $\beta$ -D-galactofuranosyl-(1 $\rightarrow$ 4)-2,3-isopropylidene- $\alpha$ -L-rhamnopyranosyl-**  
12 **(1 $\rightarrow$ 3)-2-acetamido-4,6-*O*-benzylidene-2-deoxy- $\alpha$ -D-glucopyranoside (13).**

13 The compound was prepared from alcohol **12** (2.3 g, 2.1 mmol), thioglycoside **10** (1.8 g, 2.5  
14 mmol), powdered 4 Å molecular sieves (0.5 g), NIS (0.9 g, 4.0 mmol), silver  
15 trifluoromethane sulfonate (0.13 g, 0.5 mmol) in  $\text{CH}_2\text{Cl}_2$  (80 mL) as described for  
16 compound **11**. TMSOTf (10  $\mu\text{L}$ ) was added 10 min after AgOTf addition as the glycosylation  
17 was very sluggish. Tetrasaccharide **13** (3.1 g, 89%) was obtained as an amorphous solid.  $R_f$   
18 0.31, (1:1, hexane–EtOAc);  $[\alpha]_{\text{D}} -6.7$  ( $c$  0.5,  $\text{CHCl}_3$ );  $^1\text{H}$  NMR (500 MHz,  $\text{CDCl}_3$ ,  $\delta_{\text{H}}$ ) 8.01–7.91  
19 (m, 9 H, Ar), 7.83–7.74 (m, 4 H, Ar), 7.60–7.03 (m, 22 H), 5.83 (ddd, 1 H,  $J = 3.9, 7.7, 11.4$   
20 Hz), 5.80–5.76 (m, 3 H), 5.74 (s, 1 H), 4.64 (d, 1 H,  $J = 3.5$  Hz), 5.57–5.53 (m, 3 H), 5.10 (s, 1  
21 H), 4.88 (dd, 1 H,  $J = 3.7, 4.9$  Hz), 4.74–4.66 (m, 3 H), 4.54 (dd, 1 H,  $J = 4.0, 11.9$  Hz), 4.46–  
22 4.34 (m, 3 H), 4.30–4.26 (m, 2 H), 4.09 (d, 1 H,  $J = 5.9$  Hz), 4.02–3.82 (m, 3 H), 3.79–3.66 (m,  
23 2 H), 3.64–3.53 (m, 2 H), 3.41 (ddd, 1 H,  $J = 6.6, 9.6, 13.2$  Hz), 2.61–2.40 (m, 4 H), 2.03 (s, 6  
24 H), 1.64–1.58 (m, 3 H), 1.52 (s, 3 H), 1.40–1.20 (m, 13 H), 0.9 (t, 3 H,  $J = 7.0$  Hz), 0.83 (d, 3 H,

1  $J = 6.0$  Hz);  $^{13}\text{C}$  NMR (125 MHz,  $\text{CDCl}_3$ ,  $\delta_{\text{C}}$ ) 206.2, 172.1, 169.9, 166.1, 165.7, 165.3, 165.2,  
2 137.1 133.4, 133.3, 133.2, 133.2, 133.1, 133.0, 129.9, 129.9, 129.8, 129.8, 129.7, 129.6,  
3 129.5, 129.0, 129.0, 128.9, 128.8, 128.7, 128.5, 128.3, 128.2, 128.0, 126.2, 109.4, 105.5,  
4 104.0, 101.6, 98.2, 98.1, 82.7, 82.0, 81.9, 81.9, 80.1, 77.8, 77.7, 77.6, 76.4, 76.2, 74.8, 72.9,  
5 70.4, 68.9, 68.3, 64.8, 64.4, 63.2, 63.1, 53.6, 37.8, 31.8, 29.6, 29.5, 29.3, 29.3, 29.2, 27.9, 27.8,  
6 26.3, 26.2, 23.4, 22.6, 17.2, 14.1. HRMS (ESI) calcd. for  $(\text{M}+\text{Na})^+$   $\text{C}_{91}\text{H}_{99}\text{NO}_{28}\text{Na}$  1676.6245,  
7 found 1676.6241.

8

9 **Octyl 2,3,5-tri-*O*-benzoyl- $\beta$ -D-galactofuranosyl-(1 $\rightarrow$ 5)-2,3,6-tri-*O*-benzoyl- $\beta$ -D-**  
10 **galactofuranosyl-(1 $\rightarrow$ 4)-2,3-isopropylidene- $\alpha$ -L-rhamnopyranosyl-(1 $\rightarrow$ 3)-2-**  
11 **acetamido-4,6-*O*-benzylidene-2-deoxy- $\alpha$ -D-glucopyranoside (14).**

12 To a solution of **13** (2.86 g, 1.7 mmol) in  $\text{CH}_2\text{Cl}_2$ -MeOH (9:1, 90 mL), hydrazine acetate (0.4  
13 g, 4.3 mmol) was added and the mixture was stirred for 100 min. The solution was poured  
14 into chilled  $\text{H}_2\text{O}$  (30 mL) and the  $\text{CH}_2\text{Cl}_2$  layer was separated, washed with  $\text{H}_2\text{O}$  (30 mL),  
15 separated again, dried with anhydrous  $\text{Na}_2\text{SO}_4$  and concentrated to a syrup that was  
16 purified by column chromatography (2:1 hexane-EtOAc) to afford **14** (2.6 g, 97%) as an  
17 amorphous solid.  $R_f$  0.40 (1:1 hexane-EtOAc); HRMS (ESI) calcd. for  $(\text{M}+\text{Na})^+$   
18  $\text{C}_{86}\text{H}_{93}\text{NO}_{26}\text{Na}$  1578.5878, found 1578.5856. The compound was not further characterized  
19 before being carried onto the next step.

20

21 **Octyl 2,3,6-tri-*O*-benzoyl-5-*O*-levulinoyl- $\beta$ -D-galactofuranosyl-(1 $\rightarrow$ 6)-2,3,5-tri-*O*-**  
22 **benzoyl- $\beta$ -D-galactofuranosyl-(1 $\rightarrow$ 5)-2,3,6-tri-*O*-benzoyl- $\beta$ -D-galactofuranosyl-**

1 **(1→4)-2,3-isopropylidene- $\alpha$ -L-rhamnopyranosyl-(1→3)-2-acetamido-4,6-O-**  
2 **benzylidene-2-deoxy- $\alpha$ -D-glucopyranoside (15).**

3 The compound was prepared from alcohol **14** (2.6 g, 1.67 mmol), thioglycoside **9** (1.4 g, 2.0  
4 mmol), powdered 4 Å molecular sieves (0.65 g), NIS (0.54 g, 2.4 mmol), silver  
5 trifluoromethane sulfonate (0.13 g, 0.5 mmol) in CH<sub>2</sub>Cl<sub>2</sub> (80 mL) as described for  
6 compound **11**. TMSOTf (10  $\mu$ L) was added 10 min after AgOTf addition as the glycosylation  
7 was very sluggish. Pentasaccharide **15** (2.86 g, 81%) was obtained as an amorphous solid.  
8 *R<sub>f</sub>* 0.15 (1:1, hexane–EtOAc), [ $\alpha$ ]<sub>D</sub> +2.1 (*c* 0.4, CHCl<sub>3</sub>); <sup>1</sup>H NMR (500 MHz, CDCl<sub>3</sub>,  $\delta$ <sub>H</sub>) 8.01–  
9 7.91 (m, 15 H), 7.88–7.76 (m, 5 H), 7.60–7.04 (m, 30 H), 5.90 (ddd, 1 H, *J* = 3.8, 7.7, 11.6 Hz),  
10 5.82 (d, 1 H, *J* = 5.3 Hz), 5.78 (s, 1 H), 5.76–5.70 (m, 3 H), 5.66–5.62 (m, 2 H), 5.55 (d, 1 H, *J* =  
11 1.5 Hz), 5.54 (s, 1 H), 5.43 (d, 1 H, *J* = 4.9 Hz), 5.33 (d, 1 H, *J* = 1.5 Hz), 5.19 (s, 1 H), 5.10 (s, 1  
12 H), 4.84 (dd, 1 H, *J* = 4.2, 4.2 Hz), 4.74–4.64 (m, 4 H), 4.63–4.50 (m, 2 H), 4.55–4.50 (m, 1 H),  
13 4.44–4.38 (m, 2 H), 4.31–4.26 (m, 2 H), 4.12–4.07 (m, 2 H), 4.02–3.82 (m, 3 H), 3.78–3.67  
14 (m, 2 H), 3.62 (dd, 1 H, *J* = 9.6, 9.6 Hz), 3.55 (dd, 1 H, *J* = 7.2, 10.2 Hz), 3.41 (ddd, 1 H, *J* = 6.6,  
15 9.6, 13.2 Hz), 2.63–2.40 (m, 4 H), 2.02 (s, 3 H), 2.01 (s, 3 H), 1.64–1.58 (m, 3 H), 1.53 (s, 3  
16 H), 1.40–1.20 (m, 13 H), 0.9 (t, 3 H, *J* = 7.0 Hz), 0.83 (d, 3 H, *J* = 6.0 Hz); <sup>13</sup>C NMR (125 MHz,  
17 CDCl<sub>3</sub>,  $\delta$ <sub>C</sub>) 205.9, 171.9, 169.8, 166.1, 165.9, 165.8, 165.7, 165.5, 165.4, 165.3, 165.2, 164.9,  
18 137.1, 133.4, 133.3, 133.3, 133.2, 133.1, 133.1, 132.9, 132.8, 130.0, 129.9, 129.8, 129.7,  
19 129.6, 129.6, 129.6, 129.1, 129.0, 129.0, 128.9, 128.9, 128.8, 128.5, 128.4, 128.3, 128.2,  
20 128.2, 128.2, 128.0, 126.2, 109.4, 106.7, 105.8, 104.0, 101.7, 98.2, 98.1, 82.7, 82.6, 82.0,  
21 81.8, 81.6, 81.5, 80.1, 77.8, 77.8, 77.6, 76.3, 76.2, 74.9, 73.0, 71.8, 70.2, 68.9, 68.3, 67.7, 65.0,  
22 64.4, 63.5, 63.2, 53.6, 37.9, 31.8, 29.6, 29.5, 29.4, 29.3, 29.2, 28.0, 27.9, 26.4, 26.2, 23.4, 22.6,  
23 17.2, 14.1. HRMS (ESI) calcd. for (M+2Na)<sup>2+</sup> C<sub>118</sub>H<sub>121</sub>NO<sub>36</sub>Na<sub>2</sub> 1087.3743, found 1087.3740.

24

## 1 Supplementary References

- 2 1. **Lee RE, Brennan PJ, Besra GS.** 1997. Mycobacterial arabinan biosynthesis: the use of  
3 synthetic arabinoside acceptors in the development of an arabinosyl transfer assay.  
4 *Glycobiology* **7**:1121-1128.
- 5 2. **Auzanneau FI, Hanna HR, Bundle DR.** 1993. The synthesis of chemically modified  
6 disaccharide derivatives of the *Shigella flexneri* Y polysaccharide antigen. *Carbohydr*  
7 *Res* **240**:161-181.
- 8 3. **Auzanneau FI, Bundle DR.** 1993. Synthesis of chlorodeoxy trisaccharides related to the  
9 *Shigella flexneri* Y polysaccharide. *Carbohydr Res* **247**:195-209.
- 10 4. **Konradsson P, Udodong UE, Fraser-Reid B.** 1990. Iodonium promoted reactions of  
11 disarmed thioglycosides. *Tetrahedron Letters* **31**:4313-4316.
- 12 5. **Pozsgay V, Jennings HJ.** 1988. Synthetic oligosaccharides related to group B  
13 streptococcal polysaccharides. 3. Synthesis of oligosaccharides corresponding to the  
14 common polysaccharide antigen of group B streptococci. *The Journal of Organic*  
15 *Chemistry* **53**:4042-4052.
- 16 6. **Aguilera B, Romero-Ramirez L, Abad-Rodriguez J, Corrales G, Nieto-Sampedro**  
17 **M, Fernandez-Mayoralas A.** 1998. Novel disaccharide inhibitors of human glioma cell  
18 division. *J Med Chem* **41**:4599-4606.
- 19 7. **Hamer GK, Perlin AS.** 1976. A <sup>13</sup>C-n.m.r. spectral study of chondroitin sulfates A, B,  
20 and C: evidence of heterogeneity. *Carbohydrate Research* **49**:37-48.
- 21 8. **Completo GC, Lowary TL.** 2008. Synthesis of Galactofuranose-Containing Acceptor  
22 Substrates for Mycobacterial Galactofuranosyltransferases. *The Journal of Organic*  
23 *Chemistry* **73**:4513-4525.
- 24 9. **Cyr N, Perlin AS.** 1979. The conformations of furanosides. A <sup>13</sup>C nuclear magnetic  
25 resonance study. *Canadian Journal of Chemistry* **57**:2504-2511.
- 26
- 27
