# Supplementary material for: Lcp1 Is a Phosphotransferase Responsible for Ligating Arabinogalactan to Peptidoglycan in Mycobacterium tuberculosis
Source: PubMed Central journal article supplement (PMC4981717; doi:10.1128/mbio.00972-16), 2016-08-02

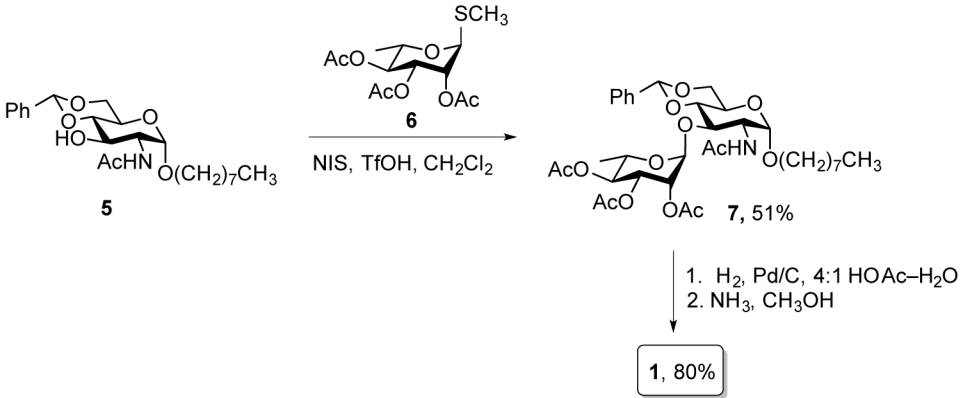

Supplement: mbo004162922sf2.pdf [file mbo004162922sf2.pdf]
